# Supplementary material
Source: PubMed Central journal article supplement (PMC9906227)

## Supplementary Figure. 2

Donor cause of death March – May 2020

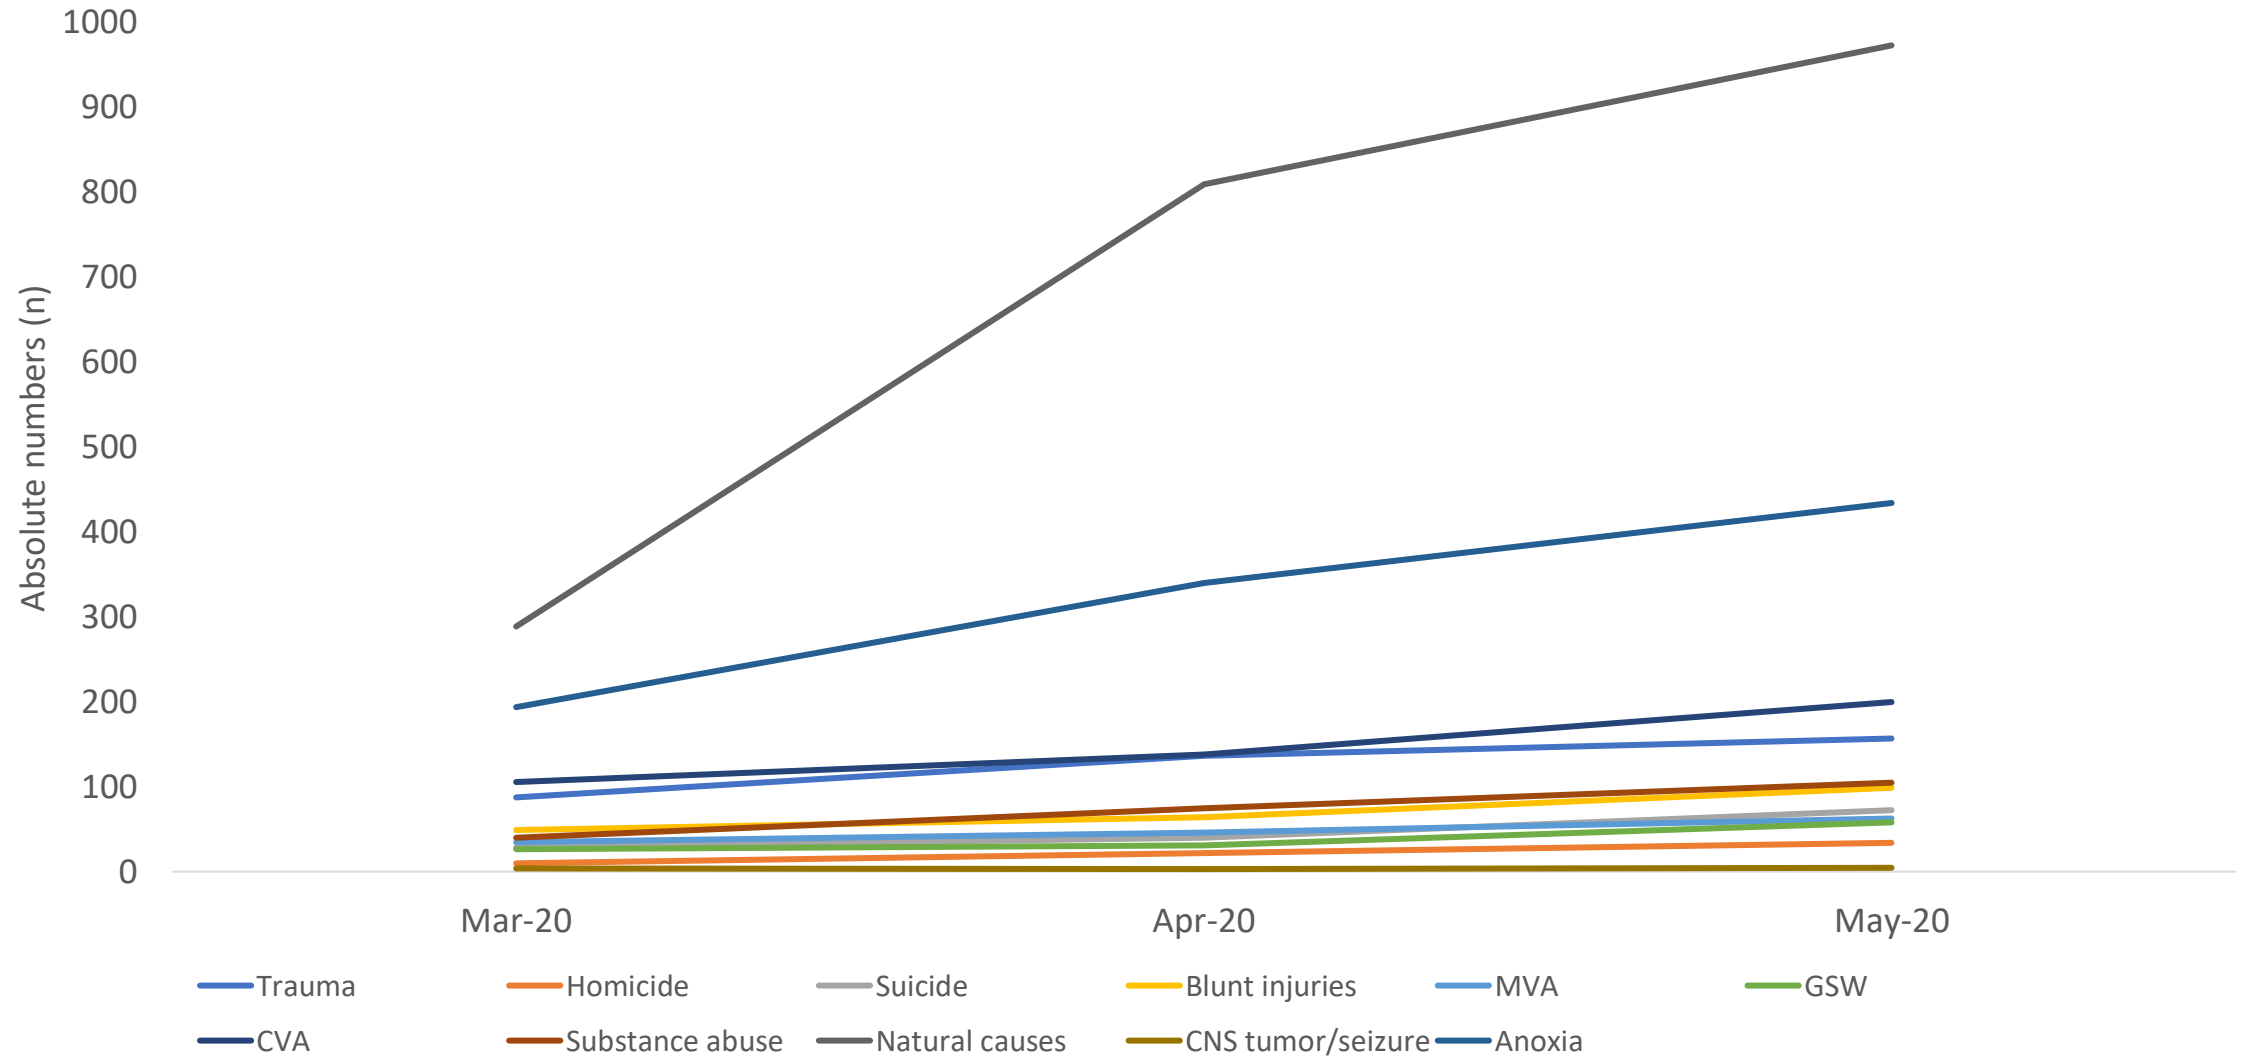

Supplement: mmc2-sup2-files2.pdf [file mmc2-sup2-files2.pdf]

### Supplementary Figure. 3

Donor cause of death March - May 2019

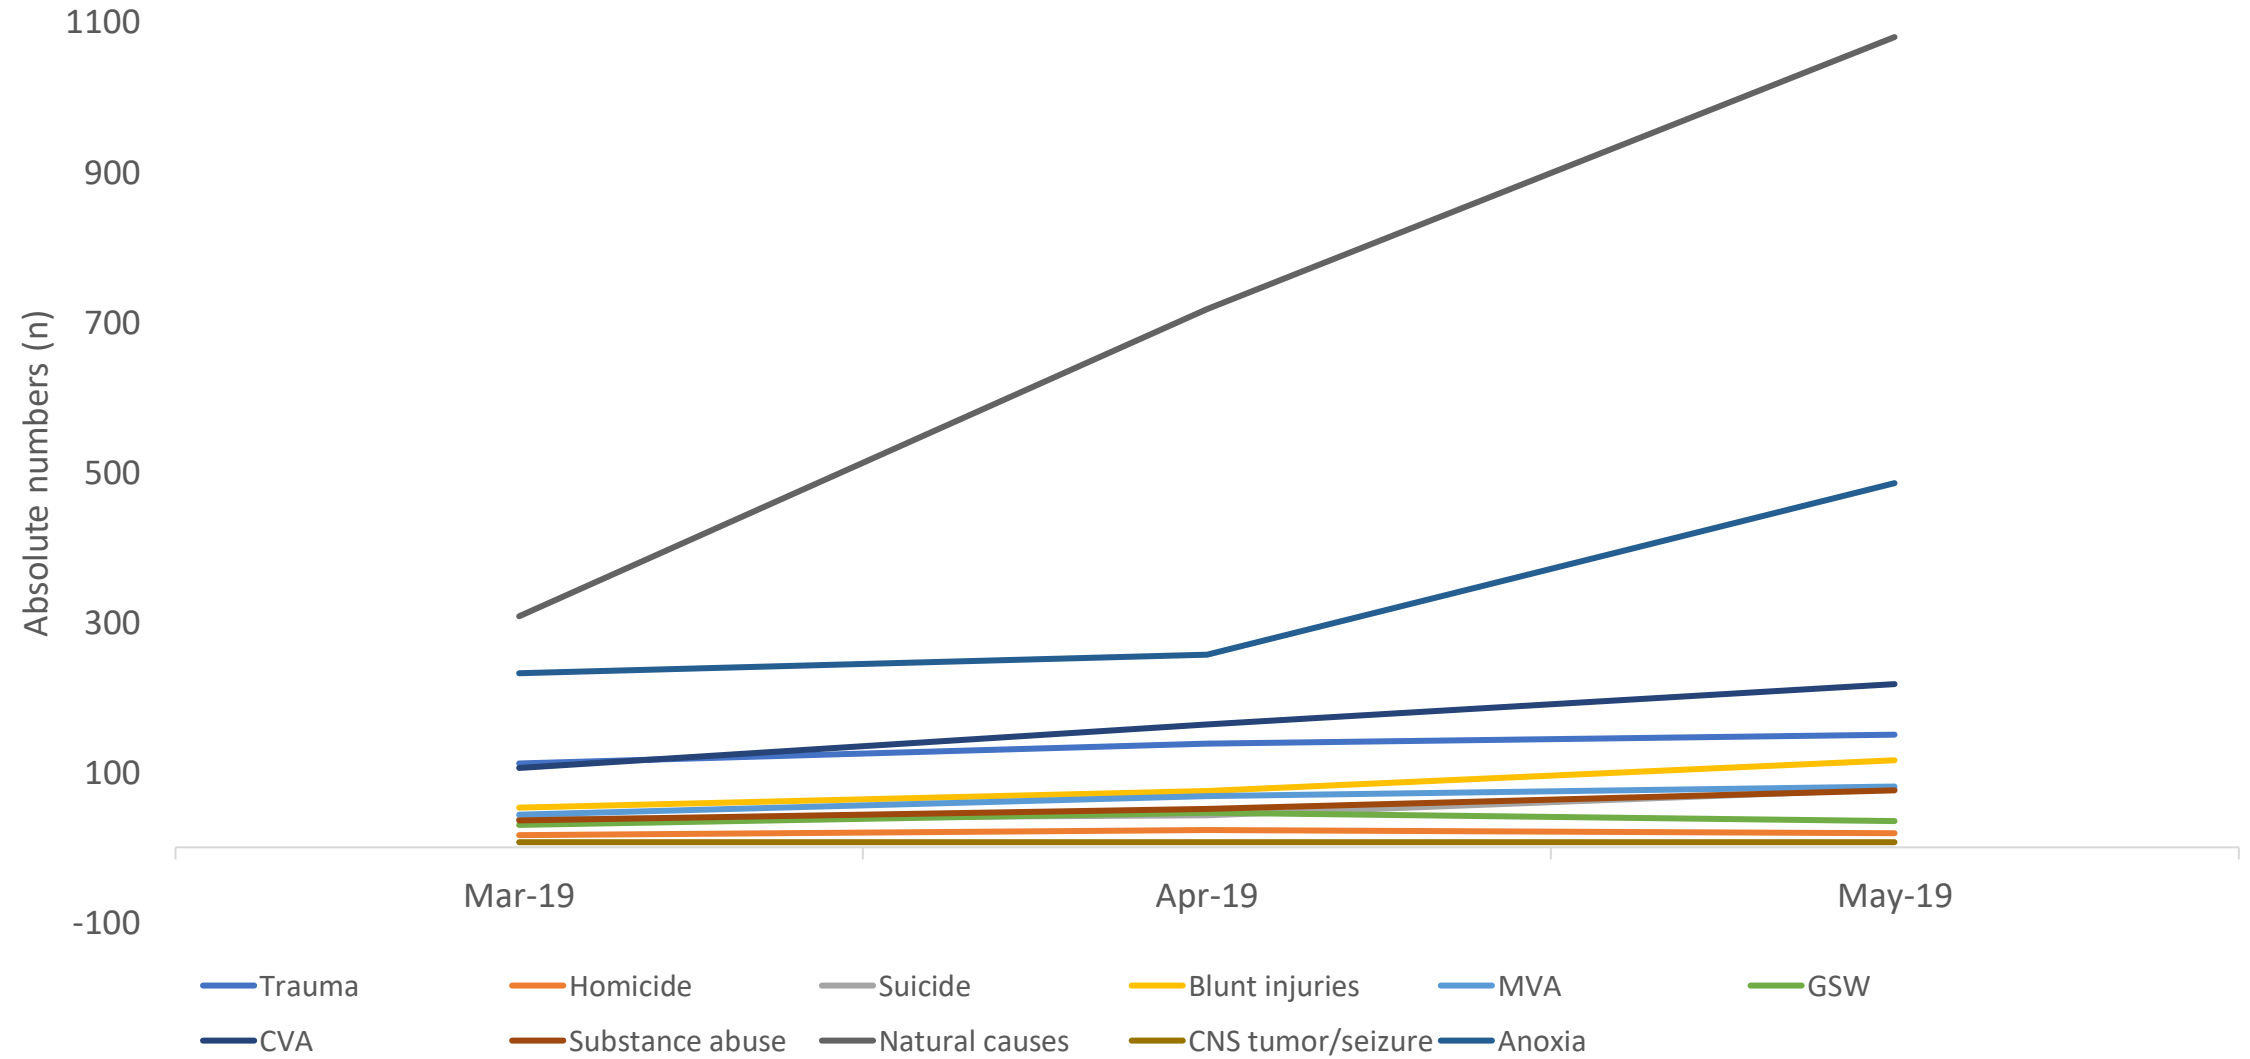

Supplement: mmc3-sup3-files3.pdf [file mmc3-sup3-files3.pdf]
